# Supplementary material for: The matrix protein Fibulin-3 promotes KISS1R induced triple negative breast cancer cell invasion
Source: Oncotarget. 2018 Jul 10;9(53):30034–52. doi: 10.18632/oncotarget.25682 (PMC6059025; doi:10.18632/oncotarget.25682)
Supplement: Supplementary file 1 [file oncotarget-09-30034-s001.pdf]

## The matrix protein Fibulin-3 promotes KISS1R induced triple negative breast cancer cell invasion

### SUPPLEMENTARY MATERIALS

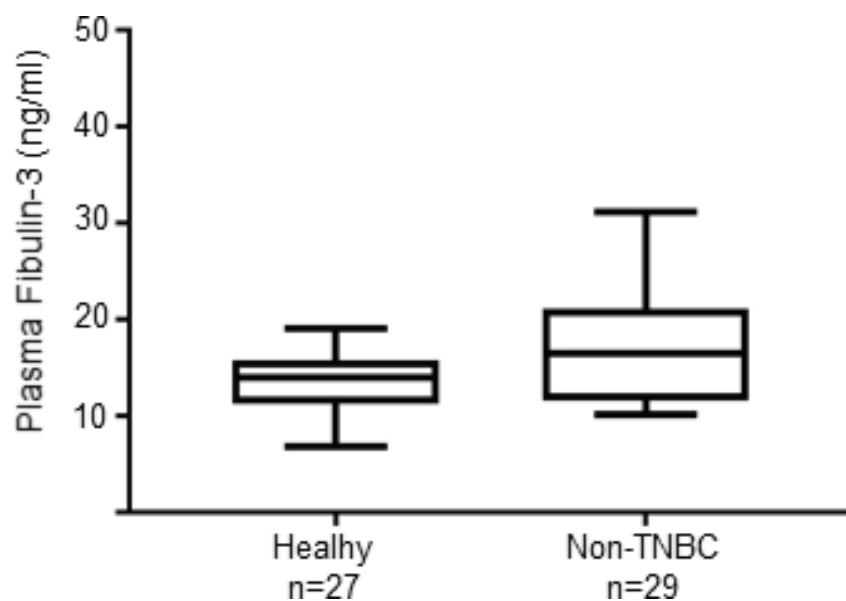

**Supplementary Figure 1: Fibulin-3 expression levels in non-TNBC (ER/PR-positive, HER2-negative) patients.** Plasma fibulin-3 levels (ng/mL) measured by ELISA in blood samples taken from healthy subjects ( $n = 27$ ), or non-TNBC breast cancer patients ( $n = 29$ ). Statistical analysis done using Wilcoxon two-sample test. Error bars: SD.

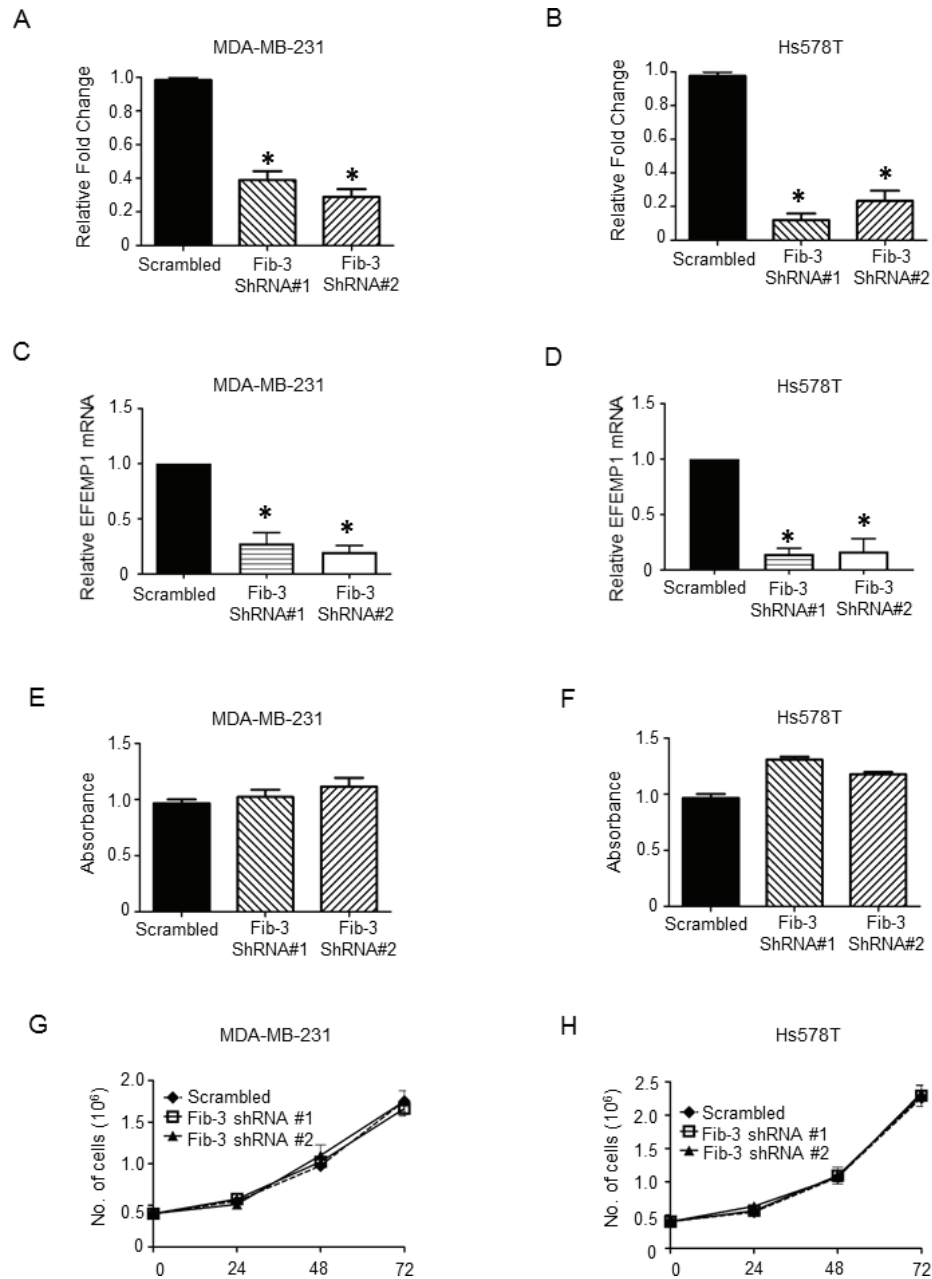

**Supplementary Figure 2: Fibulin-3 knockdown in TNBC cells.** Densitometric analysis of western blots (representative shown in Figure 2A) of the expression of fibulin-3 in (A) MDA-MB-231 and (B) Hs578T cells stably expressing fibulin-3 shRNA or scrambled control ( $n = 3$ ). One-way ANOVA followed by Dunnett's multiple comparison test:  $*P < 0.05$  compared to scrambled. Bars represent protein expression  $\pm$  SEM. (C) Relative mRNA expression of fibulin-3 gene, *EFEMP1* by RT-qPCR in (C) MDA-MB-231 and (D) Hs578T cells stably expressing fibulin-3 shRNA or scrambled control ( $n = 3$ ). Columns represent mean relative mRNA expression, normalized to GAPDH  $\pm$  SEM; student's unpaired *T*-test:  $P < 0.05$ . Cell viability assays of (E) MDA-MB-231 and (F) Hs578T cells expressing fibulin-3 shRNA or scrambled control cultured in 96-well plates as determined by MTT assay ( $n = 3$ ). Bars represent absorbance measured at 550 nm minus background reading at 700 nm  $\pm$  SEM. MDA-MB-231 (G) or Hs578T (H) cells ( $4 \times 10^5$ ) expressing fibulin-3 shRNA or scrambled control were cultured for 72 hours and cells counted at 24-hour intervals ( $n = 3$ ); downregulation of endogenous fibulin-3 does not affect cell growth.

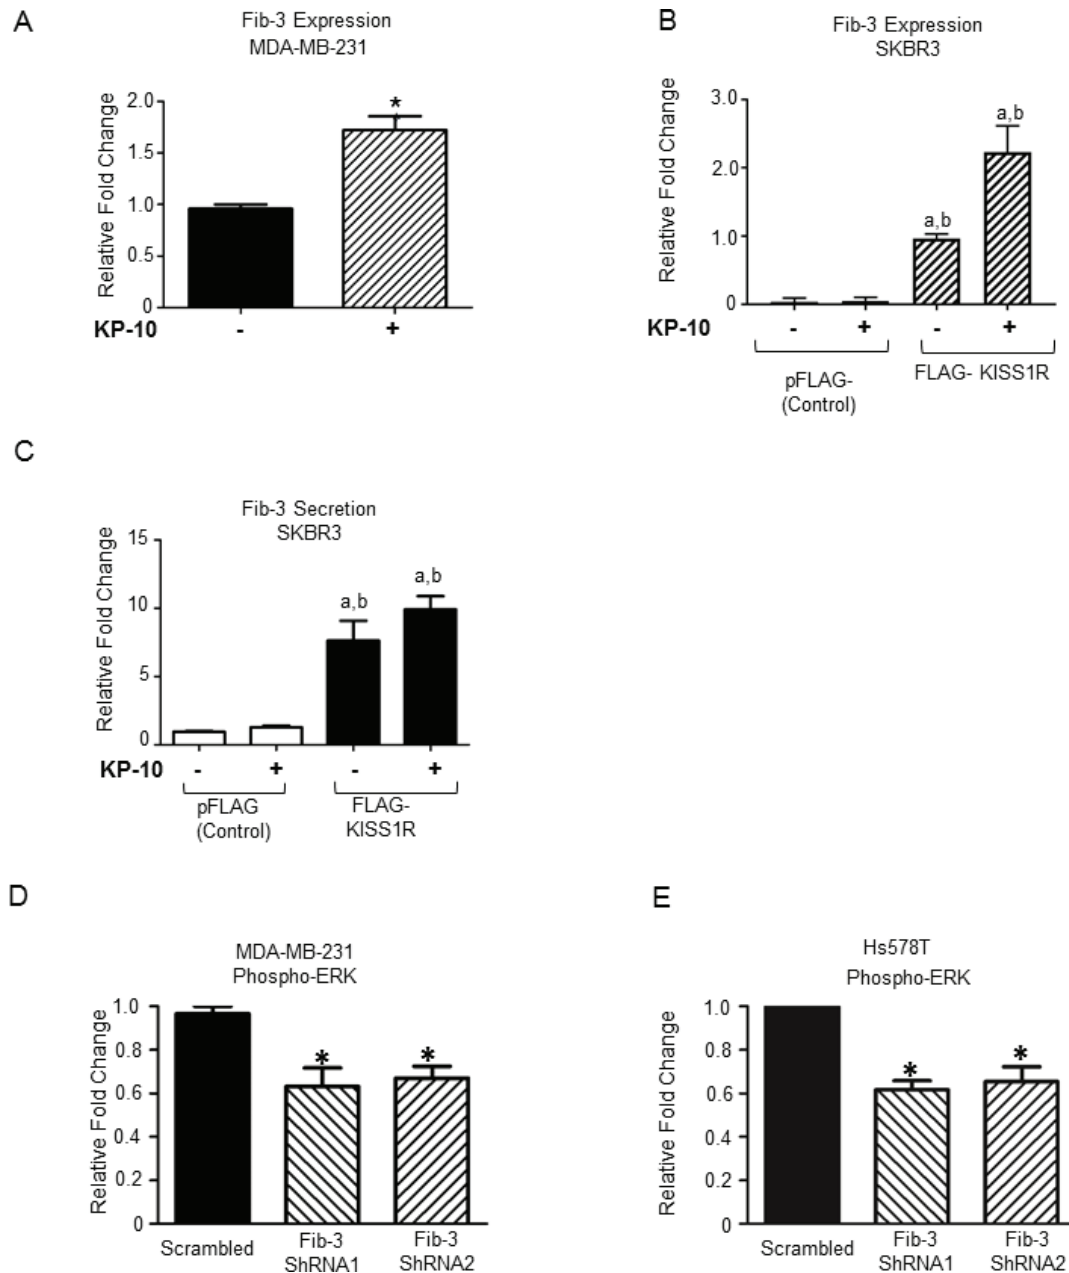

**Supplementary Figure 3: Densitometric analysis of western blots.** (A) Densitometric analysis of western blots showing the expression of fibulin-3 in MDA-MB-231 cells treated with KP-10 (100 nM, 72 h; see Figure 5D for representative blot;  $n = 3$ ). Bars represent protein expression  $\pm$  SEM. \*Student's  $t$ -test:  $P < 0.05$  compared to unstimulated cells. (B) Densitometric analysis of western blots showing fibulin-3 expression in SKBR3 cells stably expressing FLAG-KISS1R (see Figure 5D for representative blot;  $n = 3$ ). One-way ANOVA followed by Dunnett's multiple comparison test: a,  $P < 0.05$  compared to pFLAG vehicle; b,  $P < 0.05$  compared to pFLAG KP-10. Bars represent protein expression  $\pm$  SEM. (C) Densitometric analysis of western blots showing fibulin-3 expression in conditioned media from SKBR3 cells stably expressing FLAG-KISS1R or pFLAG vector control following KP-10 (100 nM, 72 h treatment;  $n = 3$ ; see Figure 5E for representative blot). One-way ANOVA followed by Dunnett's multiple comparison test: a,  $P < 0.05$  compared to pFLAG vehicle; b,  $P < 0.05$  compared to pFLAG KP-10. Bars represent protein expression  $\pm$  SEM. Densitometric analysis of western blots in Figure 7A, 7B showing pERK expression in (D) MDA-MB-231 cells or (E) Hs578T cells expressing fibulin-3 shRNA or scrambled control ( $n = 3$ ). One-way ANOVA followed by Dunnett's multiple comparison test: \* $P < 0.05$  compared to scrambled. Bars represent protein expression  $\pm$  SEM.

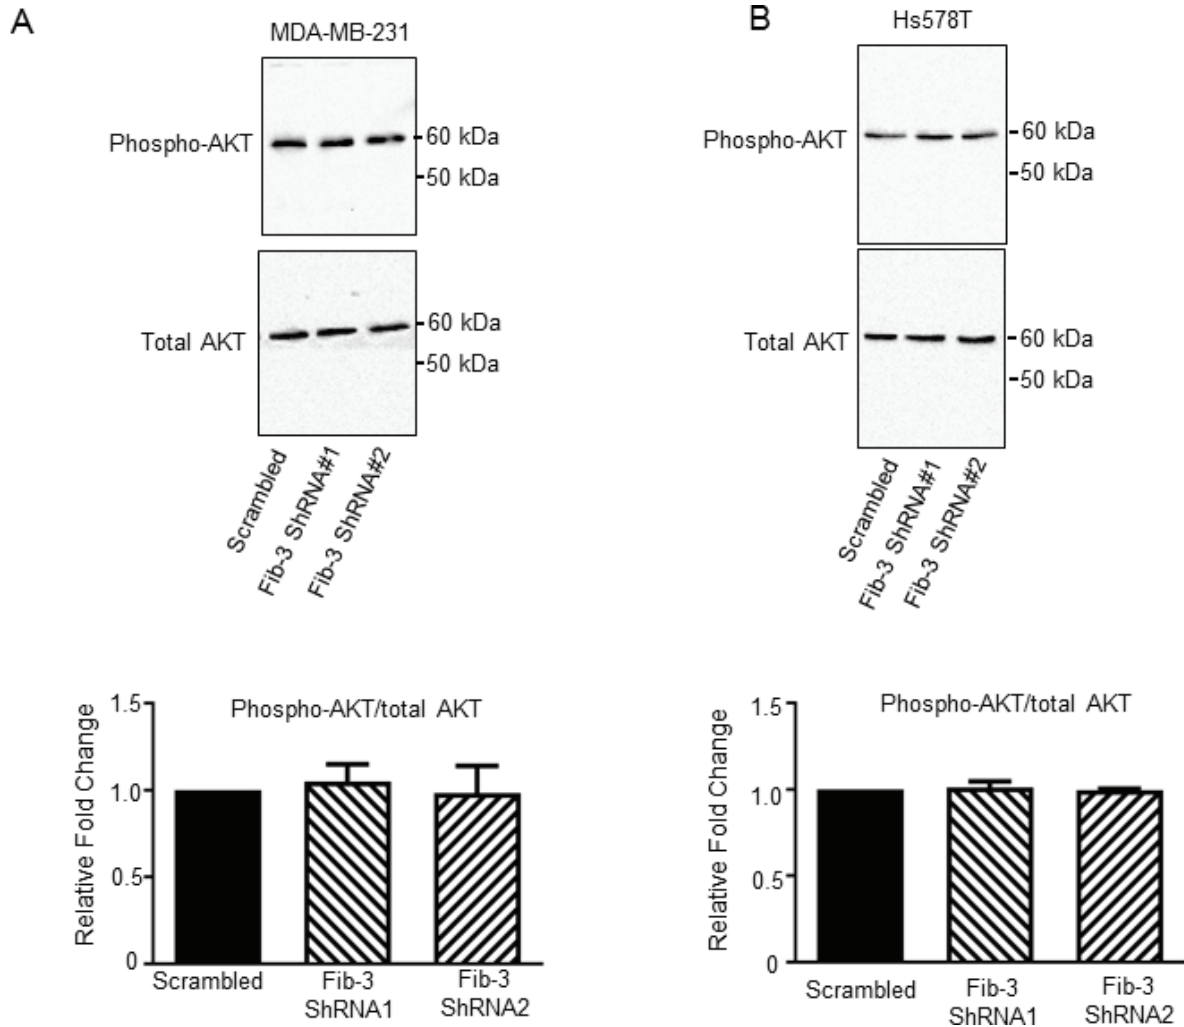

**Supplementary Figure 4: Western blots of AKT expression in TNBC cells.** Representative western blot of pAKT and total AKT in (A) MDA-MB-231 cells or (B) Hs578T cells, expressing fibulin-3 shRNA or scrambled control; total AKT, loading control ( $n = 4$ ). Bars  $\pm$  SEM represent protein expression in the densitometric analysis of blots.

**Supplementary Movie 1: Time-lapse microscopy of MDA-MB-231 cells stably expressing scrambled control or fibulin-3 shRNA (top and bottom panels, respectively); images acquired every 15 minutes for 18 h using Olympus IX-81 microscope. See Supplementary\_Movie\_1**
